# Supplementary material for: Cyclodextrin-modified poly(octamethylene citrate) polymers towards enhanced sorption properties
Source: Royal Society of Chemistry journal article supplement (doi:10.1039/c9sm02075f), 2020-01-01
Supplement: c9sm02075f1.pdf [file c9sm02075f1.pdf]

## Supplementary Information

### Cyclodextrin-modified poly(octamethylene citrate) polymers towards enhanced sorption properties

Wiktor Kasprzyk,<sup>\*a</sup> Szczepan Bednarz,<sup>a</sup> Dariusz Bogdał,<sup>a</sup> Guillermo Ameer,<sup>b</sup> Tomasz Świergosz<sup>c</sup>

<sup>a</sup>. Department of Biotechnology and Physical Chemistry, Faculty of Chemical Engineering and Technology, Cracow University of Technology, 24 Warszawska St., 31-155 Kraków, Poland

<sup>b</sup>. Biomedical Engineering Department, Northwestern University, Evanston IL 60208, USA

<sup>c</sup>. Department of Analytical Chemistry, Faculty of Chemical Engineering and Technology, Cracow University of Technology, 24 Warszawska St., 31-155 Kraków, Poland

\* Corresponding author, e-mail: wiktorkasprzyk@pk.edu.pl

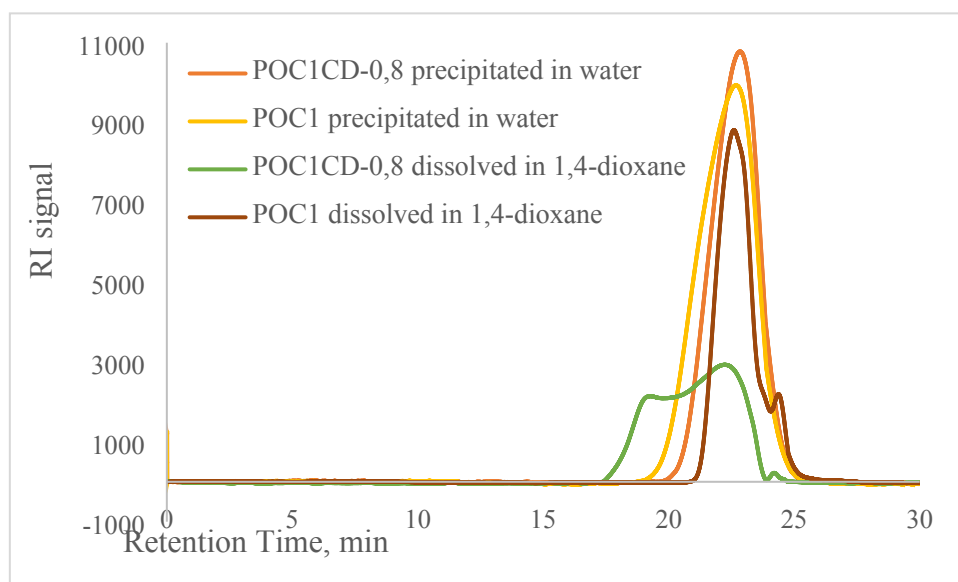

**Figure S1.** GPC chromatograms of POC and POC1CD prepolymers purified by different methods.

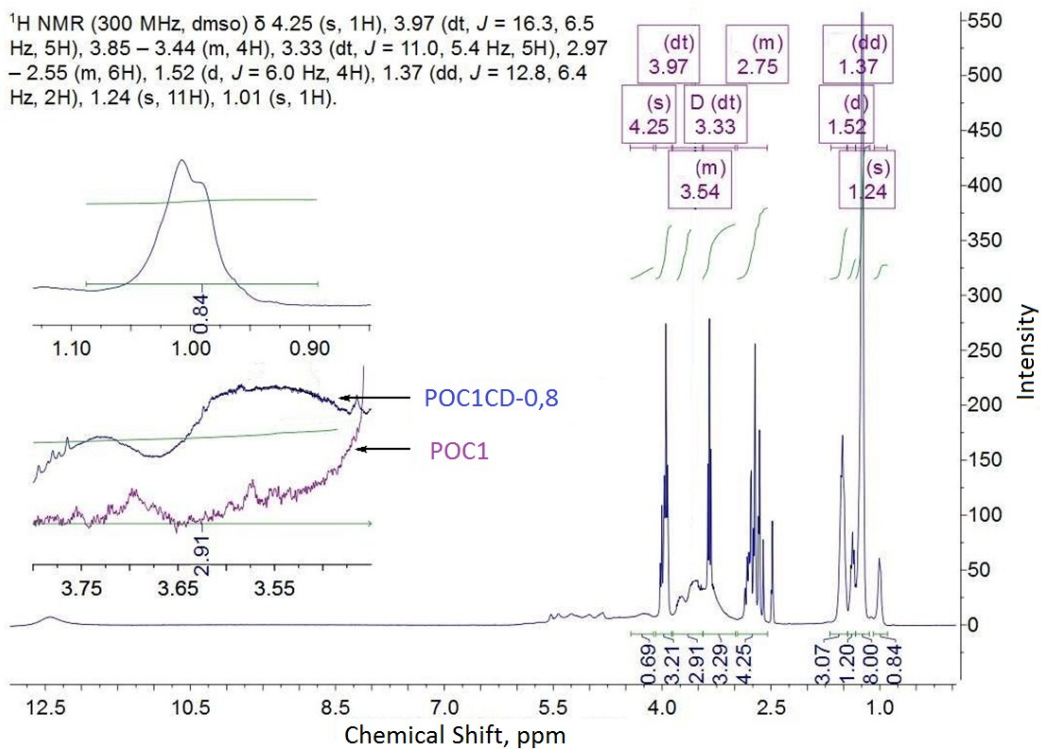

Figure S2.  $^1\text{H}$  NMR spectra of POC1CD-0,8 prepolymer.

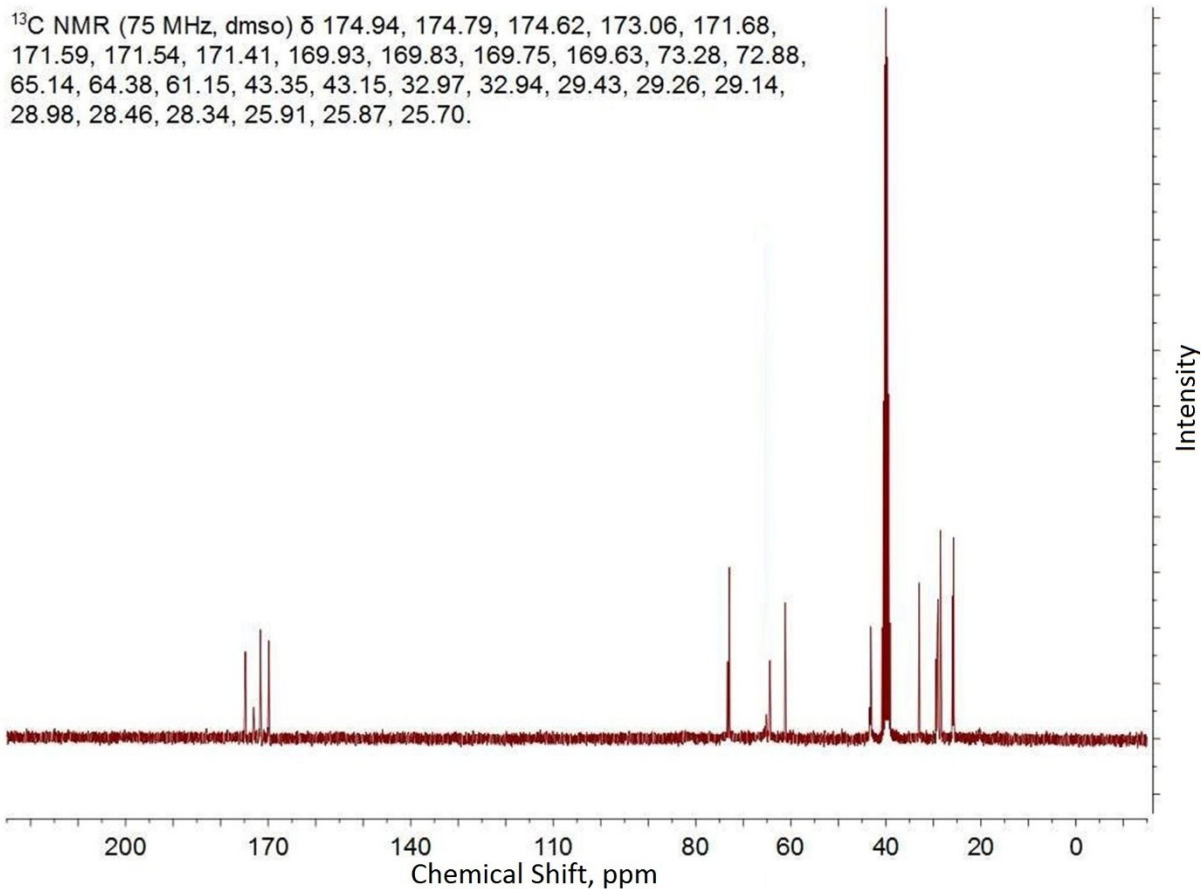

Figure S3.  $^{13}\text{C}$  NMR spectra of POC1CD-0,8.

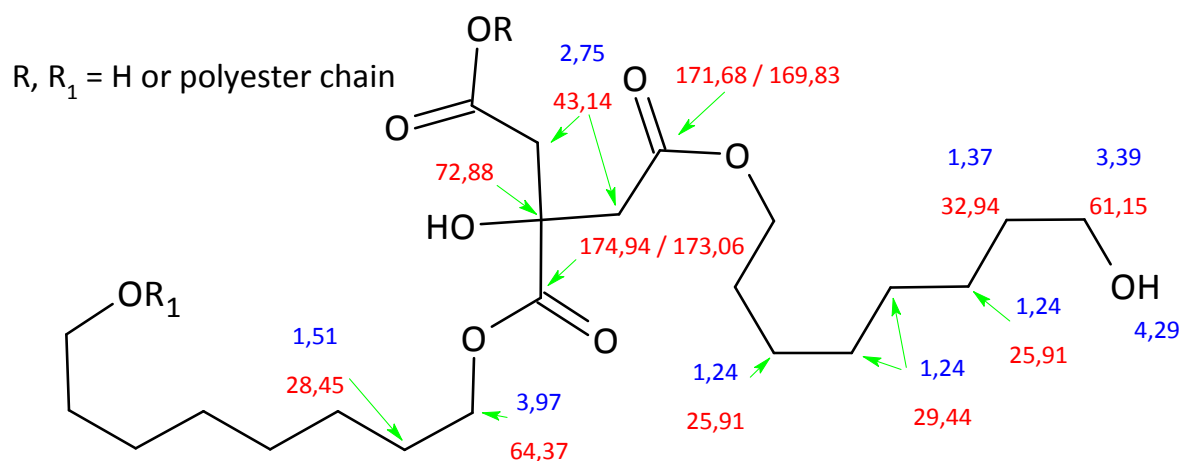

**Figure S4.** Corrected NMR chemical shifts of POC prepolymer (<sup>1</sup>H NMR signals – blue, <sup>13</sup>C NMR signals – red, ppm).

**Table S1.** Number and weight average molecular weights ( $\bar{M}_n$  and  $\bar{M}_w$ ), polydispersity ( $\bar{M}_w / \bar{M}_n$ ) and acid number of prepolymer samples.

| sample      | $\bar{M}_n$ | $\bar{M}_w$ | $\bar{M}_w / \bar{M}_n$ | Acid number<br>(mg KOH/g) |
|-------------|-------------|-------------|-------------------------|---------------------------|
| POC1        | 2750        | 6397        | 2,32                    | 182.3                     |
| POC1,25     | 4014        | 7265        | 1,81                    | 177.4                     |
| POC1,5      | 2950        | 9343        | 3,16                    | 170.3                     |
| POC1CD-1,2  | 10525       | 12188       | 1,15                    | 171.3                     |
|             | 3331        | 3710        | 1,11                    |                           |
| POC1CD-0,8  | 14447       | 18673       | 1,29                    | 171.4                     |
|             | 3825        | 4235        | 1,11                    |                           |
| POC1CD-0,6  | 18047       | 23673       | 1,31                    | 174.1                     |
|             | 4156        | 4825        | 1,16                    |                           |
| POC1CD-0,3  | 48423       | 79291       | 1,64                    | 175.4                     |
|             | 5699        | 7495        | 1,31                    |                           |
| POC1CD-0,15 | 29476       | 48520       | 1,65                    | 180.4                     |
|             | 5218        | 6301        | 1,21                    |                           |

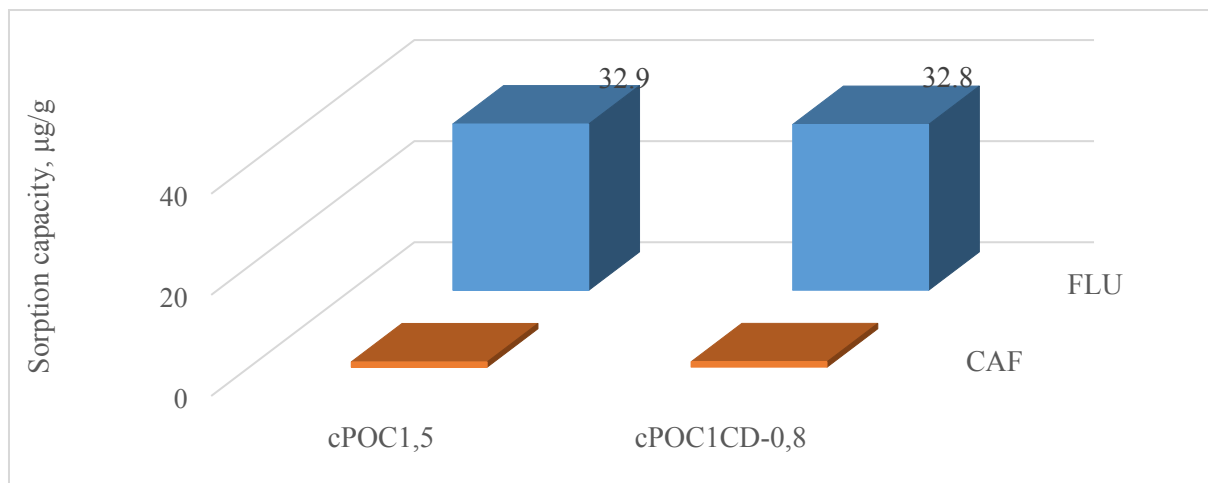

**Figure S5.** FLU and CAF loading properties of cPOCCD materials and cPOC controls.
